# Supplementary material
Source: PubMed Central journal article supplement (PMC3697251)
Supplement: JB.02269-12_zjb999092637so1.pdf [file JB.02269-12_zjb999092637so1.pdf]

**TABLE S1** Residues selected for *in vivo* photo-crosslinking and summary of results

| Domain | Residue <sup>a</sup> | Structural basis or reference | Corresponding residue (chain) <sup>b</sup> | Results of crosslinking               |
|--------|----------------------|-------------------------------|--------------------------------------------|---------------------------------------|
| NBD    | Leu2                 | 2IPC/(1, 2)                   | Met1 (C)                                   | SecA dimer and SecA-EF-Tu             |
|        | Ile3                 | Div_dimer/2IPC/(1, 2)         | Leu2 (A, B)/Leu2 (C)                       | SecA dimer and SecA-EF-Tu             |
|        | Lys4                 | Div_dimer/(1, 2)              | Gly3 (A, B)                                | SecA dimer and SecA-EF-Tu             |
|        | Leu5                 | Div_dimer/(1, 2)              | Ile4 (A, B)                                | SecA dimer and SecA-EF-Tu             |
|        | Leu6                 | Div_dimer/(1, 2)              | Leu5 (A, B)                                | SecA dimer and SecA-EF-Tu             |
|        | Thr7                 | Div_dimer/2IBM/2IPC/(1, 2)    | Asn6 (A, B)/Asn6 (A)/Arg6 (A, B)           | SecA dimer                            |
|        | Lys8                 | Div_dimer/2IBM/(1, 2)         | Lys7 (A, B)/Lys7 (A)                       | SecA dimer and SecA-EF-Tu             |
|        | Val9                 | Div_dimer/2IBM/(1, 2)         | Met8 (A, B)/Met8 (A)                       | SecA dimer and SecA-EF-Tu             |
|        | Phe10                | (1, 2)                        |                                            | SecA dimer                            |
|        | Gly11                | 2IPC/(1, 2)                   | Asp10 (A, B)                               | SecA dimer and SecA-EF-Tu             |
|        | Phe68                | – <sup>c</sup>                |                                            | protein precipitated                  |
|        | Tyr134               | 2FSF-PBD                      | Tyr134 (A, B)                              | protein precipitated                  |
|        | Ser402               | – <sup>c</sup>                |                                            | no crosslink                          |
| PBD    | His262               | 2FSF-PBD                      | His262 (B)                                 | no crosslink                          |
|        | Phe263               | 2FSF-PBD                      | Phe263 (A, B)                              | SecA dimer                            |
|        | Ser264               | 2FSF-PBD                      | Ser264 (A, B)                              | intramolecular crosslink <sup>d</sup> |
|        | Val265               | 2FSF-PBD                      | Val265 (A, B)                              | no crosslink                          |
|        | Asp266               | 2FSF-PBD                      | Asp266 (A, B)                              | intramolecular crosslink <sup>d</sup> |
|        | Val272               | – <sup>c</sup>                |                                            | no crosslink                          |
|        | Thr340               | Div_dimer/2IBM                | Thr320 (A, B)/Thr320 (B)                   | no crosslink                          |
| IRA2   | Thr470               | 2FSF-PBD/2IBM                 | Thr470 (A, B)/Lys450 (B)                   | protein precipitated                  |
|        | Ile474               | – <sup>c</sup>                |                                            | protein precipitated                  |
|        | Phe483               | 2FSF-PBD                      | Phe483 (A, B)                              | no crosslink                          |
|        | Thr530               | 2FSF-PBD                      | Thr530 (A, B)                              | no crosslink                          |
|        | Phe598               | Div_dimer/2IBM                | Phe549 (A, B)/Phe549 (A, B)                | weak crosslink                        |
| SD     | Ser636               | Div_dimer/2IBM                | Gly587 (A, B)/Gly587 (A, B)                | no crosslink                          |
|        | Phe639               | Div_dimer/2IBM                | Phe590 (A, B)/Phe590 (A)                   | intramolecular crosslink <sup>d</sup> |
|        | Gln662               | Div_dimer                     | Gln613 (A, B)                              | no crosslink                          |
|        | Glu665               | Div_dimer                     | Glu616 (A, B)                              | no crosslink                          |
| IRA1   | His790               | 2IBM                          | His739 (A, B)                              | intramolecular crosslink <sup>d</sup> |
|        | Leu791               | 2IBM/1NL3                     | Leu740 (B)/Leu795 (A, B)                   | intramolecular crosslink <sup>d</sup> |

(continued)

| Domain | Residue <sup>a</sup> | Structural basis or reference | Corresponding residue (chain) <sup>b</sup> | Results of crosslinking                                  |
|--------|----------------------|-------------------------------|--------------------------------------------|----------------------------------------------------------|
| IRA1   | Gly793               | – <sup>c</sup>                |                                            | intramolecular crosslink <sup>d</sup>                    |
|        | Tyr794               | 2IBM/1NL3                     | Tyr743 (B)/Met798 (A, B)                   | SecA dimer and intramolecular crosslink <sup>d</sup>     |
|        | Gln796               | Div_dimer/2IBM/2IPC           | Gln745 (A, B)/Gln745 (A)/Gln903 (C, D)     | intramolecular crosslink <sup>d</sup>                    |
|        | Asp798               | Div_dimer                     | Asn747 (A, B)                              | intramolecular crosslink <sup>d</sup>                    |
|        | Lys800               | – <sup>c</sup>                |                                            | no crosslink                                             |
|        | Gln801               | Div_dimer/2IPC                | Arg750 (A, B)/Gln908 (C, D)                | weak crosslink and intramolecular crosslink <sup>d</sup> |
|        | Tyr803               | – <sup>c</sup>                |                                            | no crosslink                                             |
|        | Lys804               | Div_dimer/2IPC                | Gln753 (A, B)/Lys911 (C, D)                | no crosslink                                             |
|        | Arg805               | Div_dimer                     | Met754 (A, B)                              | SecA dimer                                               |
|        | Ser807               | – <sup>c</sup>                |                                            | no crosslink                                             |
|        | Phe808               | Div_dimer/ (3)                | Phe757 (A, B)                              | weak crosslink                                           |
|        | Ser809               | – <sup>c</sup>                |                                            | weak crosslink and intramolecular crosslink <sup>d</sup> |
|        | Met810               | (3)                           |                                            | intramolecular crosslink <sup>d</sup>                    |
|        | Phe811               | Div_dimer/ (3)                | Phe760 (A, B)                              | no crosslink                                             |
|        | Ala812               | – <sup>c</sup>                |                                            | no crosslink                                             |
|        | Met814               | (3)                           |                                            | no crosslink                                             |
|        | Leu815               | Div_dimer/ (3)                | Ile764 (A, B)                              | weak crosslink and SecA-EF-Tu                            |
|        | Ser817               | – <sup>c</sup>                |                                            | no crosslink                                             |
|        | Leu818               | Div_dimer/ (3)                | Ile767 (A, B)                              | weak crosslink                                           |
|        | Tyr820               | – <sup>c</sup>                |                                            | no crosslink                                             |

<sup>a</sup> The indicated *ecsecA* residue was amber mutated for *pBpa* incorporation.

<sup>b</sup> The interface residues in each structure were predicted with the SPPIDER program, and the corresponding *ecSecA* residue was determined based on amino acid sequence alignment (ClustalW, <http://www.ebi.ac.uk/Tools/clustalw2/>).

<sup>c</sup> The residue was selected without a published account of its possible role in dimerization.

<sup>d</sup> The migration of the band in SDS-PAGE is just slightly slower than monomeric SecA. MS analysis shows no other protein is crosslinked to SecA and Western blot with anti-c-myc antibody suggests the band is SecA monomer.

**Figure S1**

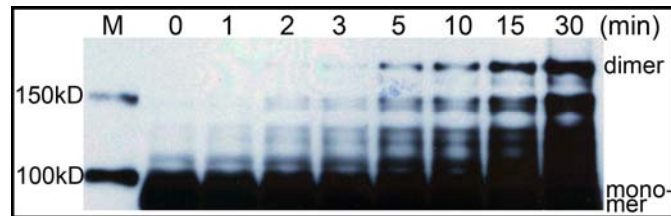

**FIG S1** Western blot analysis of SecA L6X subjected to photo-crosslinking for the indicated time. His-antibody was utilized. The positions of SecA monomer and dimer are given. Lane M shows protein molecular mass markers with molecular masses on the left.

**Figure S2**

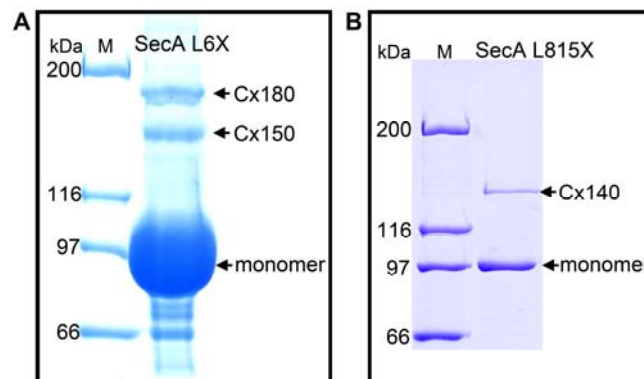

**FIG S2** Proteins for LC-MS/MS analysis were purified from UV-treated cells and resolved on 7.5% SDS-PAGE. (A) SecA L6X and its crosslinked products Cx150 and Cx180. The gel was stained with Coomassie G-250. (B) SecA L815X and its crosslinked product Cx140. Three crosslinked bands were separately cut from the gel, digested with trypsin and analyzed with LC-MS/MS. The data indicate that the Cx180 band is SecA dimer and the bands Cx150 and Cx140 represent SecA-EF-Tu complex. Lane M, protein molecular mass markers with molecular masses shown on the left of each panel.

## REFERENCES

1. **Jilaveanu LB, Zito CR, Oliver D.** 2005. Dimeric SecA is essential for protein translocation. *Proc Natl Acad Sci U S A* **102**:7511-7516.
2. **Or E, Boyd D, Gon P, Beckwith J, Rapoport T.** 2005. The bacterial ATPase SecA functions as a monomer in protein translocation. *J Biol Chem* **280**:9097-9105.
3. **Or E, Navon A, Rapoport T.** 2002. Dissociation of the dimeric SecA ATPase during protein translocation across the bacterial membrane. *EMBO J* **21**:4470-4479.
